# Supplementary material for: Effects of pH and Salinity on the Hydrothermal Transport of Tungsten: Insights from In Situ Raman Spectroscopic Characterization of K2WO4-NaCl-HCl-CO2 Solutions at Temperatures up to 400°C
Source: Hindawi journal article supplement (doi:10.1155/2020/2978984), 2020-02-12
Supplement: f1 [file 2978984.f1.pdf]

## Appendix A

### Effects of pH and salinity on the hydrothermal transport of tungsten: Insights from *in situ* Raman spectroscopic characterization of K<sub>2</sub>WO<sub>4</sub>-NaCl-HCl-CO<sub>2</sub> solutions at temperatures up to 400 °C

Xiaolin Wang <sup>a\*</sup>, Ye Qiu <sup>a</sup>, I-Ming Chou <sup>b</sup>,  
Rongqing Zhang <sup>a</sup>, Guanglai Li <sup>c</sup>, Richen Zhong <sup>d\*</sup>

<sup>a</sup> State Key laboratory for Mineral Deposits Research, School of Earth Sciences and Engineering, Nanjing University, Nanjing, Jiangsu 210023, China

<sup>b</sup> CAS Key Laboratory of Experimental Study under Deep-sea Extreme Conditions, Institute of Deep-sea Science and Engineering, Chinese Academy of Sciences, Sanya, Hainan 572000, China

<sup>c</sup> State Key Laboratory Breeding Base of Nuclear Resources and Environment, East China Institute of Technology, Nanchang, Jiangxi 330013, China

<sup>d</sup> Civil and Resource Engineering School, University of Science and Technology Beijing, Beijing 100083, China

**Corresponding authors:** Xiaolin Wang, Richen Zhong

**Xiaolin Wang**

Department of Earth Sciences  
Nanjing University  
Room 374, Zhugongshan Building  
163 Xianlin Avenue  
Nanjing  
Jiangsu 210023  
China  
Email: [xlinwang@nju.edu.cn](mailto:xlinwang@nju.edu.cn)  
Tel: +86 25 89680867

**Richen Zhong**

Civil and Resource Engineering School  
University of Science and Technology Beijing  
Room 903, Civil Building  
30 Xueyuan Road  
Beijing 100083  
China  
Email: [zhongrichen@126.com](mailto:zhongrichen@126.com)  
Tel: +86 10 62332189

## **Thermodynamic modeling of the stability of aluminosilicate phases at varying fluid pH**

The thermodynamic modeling was carried out to confirm the speciation of aluminosilicates (including K-feldspar, muscovite, topaz and kaolinite) as a function of environment's acidity in hydrothermal systems. The basis and detailed technics used for the Gibbs free energy minimization simulation can be found in [Zhong et al., \(2015\)](#), and the supplemental materials of [Wang et al. \(2019\)](#). The simulation was conducted in the K-Na-Al-Si-O-H-Cl system at 300, 350, 400 and 420 °C and 500 bar. A fluid-predominated system (with high fluid/rock ratio) was used to simulate the hydrothermal ore-forming system, with 1 kg of fluid containing 1.7 *m* of dissolved NaCl and 0.17 *m* of KCl. Varying amounts of HCl was added to the fluid to control the fluid pH. To monitor the speciation of aluminosilicates with changing fluid pH, small amount of silicate mineral (0.1 mol of muscovite) and excess quartz (1 mol) were added as the starting material. In general, muscovite will covert to K-feldspar in alkaline fluids (with high K<sup>+</sup>/H<sup>+</sup> ratios), and topaz (at high temperatures) or kaolinite (at lower temperatures) in acidic fluids, and this simulation investigates at which pH points these transitions takes place. The modeling results are shown in [Fig. S1](#). For comparison, the neutral pH values (those of pure water) are 5.43 at 300 °C, 5.57 at 350 °C, 5.94 at 400 °C and 6.22 at 420 °C (*P*=500 bar).

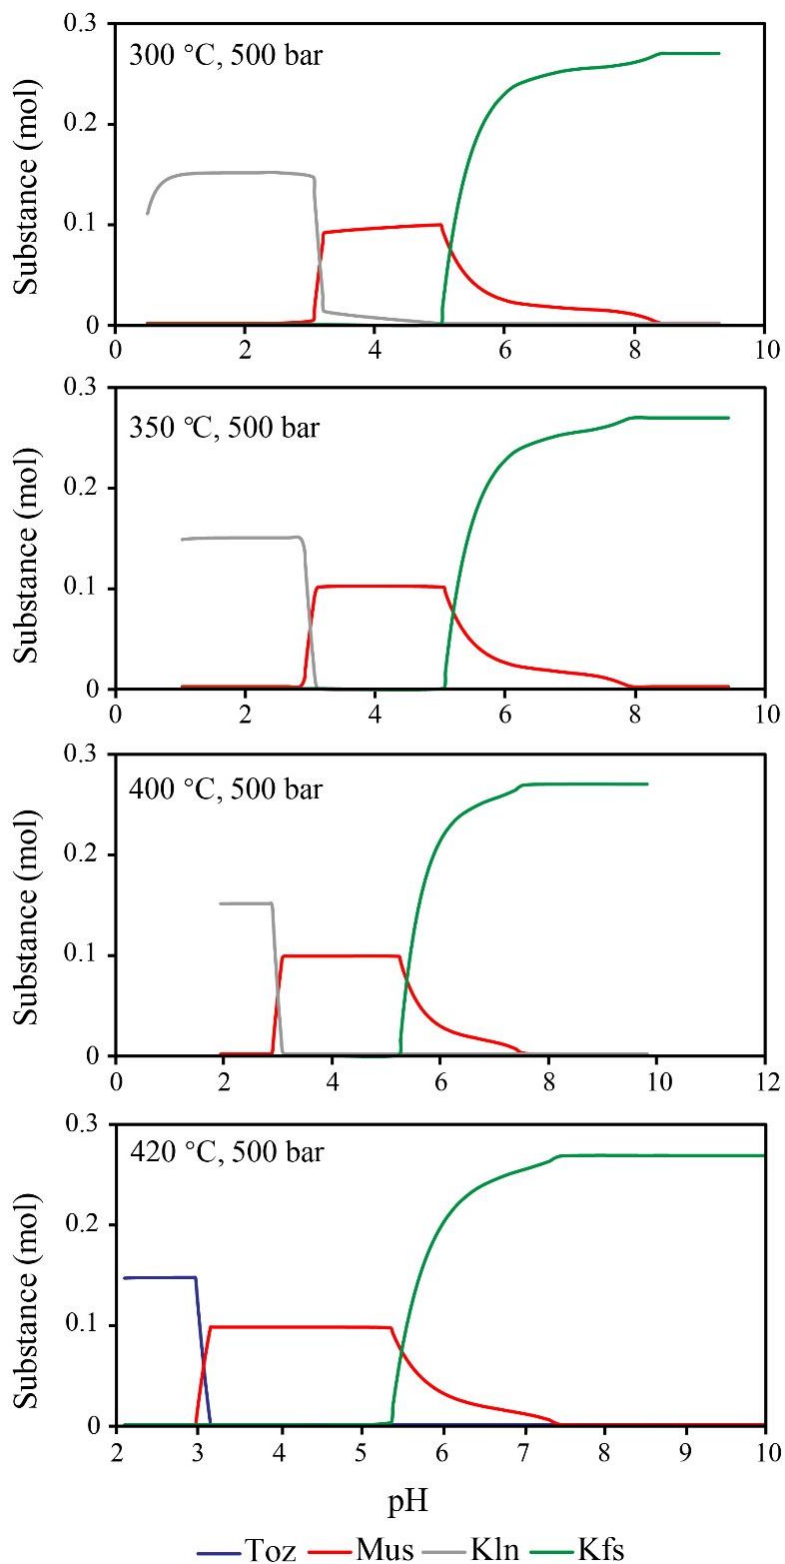

Fig. S1. The speciation of aluminosilicates at varying fluid pH. Quartz is in excess and not shown. Abbreviations: Toz=topaz, Mus=muscovite, Kln=kaolinite, Kfs=K-feldspar.

## References

- Zhong, R.C., Brugger, J., Chen, Y.J., and Li, W.B., 2015. Contrasting regimes of Cu, Zn and Pb transport in ore-forming hydrothermal fluids. *Chemical Geology* 395, 154–164.
- Wang X., Qiu Y., Lu J., Chou I-M., Zhang W., Li G., Hu W., Li Z., Zhong R. (2020) *In situ* Raman spectroscopic investigation of the hydrothermal speciation of tungsten: Implications for the ore-forming process. *Chem. Geol.* 532, article no. 119299, p1 – 14.
